# Supplementary material
Source: Springer Nature journal article supplement (https://www.springermedizin.de/resource/supplementary/12888_2010_755_MOESM1_ESM.pdf/9478424)
Supplement: MOESM1 [file 9478424]

New patients registration in specialized mental health care, signed by the GP

**Screening of in- and exclusion criteria  
in new patients by Registration  
Department**

**If a patient qualifies, the department  
distributes the patient information to  
MIDA. MIDA applies randomization  
schedule and assigns the patient to  
the correct condition**

**Planning Department notes intake  
appointment in the diary of the  
therapist in the correct condition**

Intake intervention therapist

Intake control therapist

**After intake intervention patient is  
asked to participate in research and  
sign consent**

**After intake control patient is asked  
to participate in research and sign  
consent**

**Baseline measure,  
Two weeks after intake. N=75**

**Baseline measure,  
Two weeks after intake. N=75**

Start intervention treatment

Start control treatment

**First Follow-up measure,  
Four weeks after start treatment**

**First Follow-up measure,  
Four weeks after start treatment**

**Second Follow-up measure,  
16 weeks after start treatment**

**Second Follow-up measure,  
16 weeks after start treatment**
